# Supplementary material
Source: PubMed Central journal article supplement (PMC3098495)
Supplement: emboj201194s1.pdf [file emboj201194s1.pdf]

## SUPPLEMENTAL DATA

### **Analysis of the host microRNA response to *Salmonella* uncovers the control of major cytokines by the *let-7* family**

Leon Schulte, Ana Eulalio, Hans-Joachim Mollenkopf, Richard Reinhardt, Jörg Vogel

#### **Content of Supplemental Data:**

- Tab S1** 454 read mapping-efficiency
- Tab S2** Read abundance of significantly regulated miRNAs (RAW 264.7)
- Tab S3** Read abundance of significantly regulated miRNAs (HeLa)
- Fig S1** Scatter plots 454 results (SPI-mutant infection)
- Fig S2** Analysis of miRNA-expression over time (RAW 264.7 cells)
- Fig S3** Regulation of *let-7* and miR-155 in HeLa cells
- Fig S4** Apoptosis and cytotoxicity assays (RAW 264.7 cells)
- Fig S5** *let-7* regulation in TLR4<sup>-/-</sup> macrophages exposed to *Salmonella*
- Fig S6** Identification of *let-7* target sites within IL-6 and IL-10 3' UTRs
- Fig S7** Cytokine expression upon ectopic *let-7* regulation (RAW 264.7)
- Fig S8** *let-7* expression in MEF cells

**Table S1.** Small RNA libraries

| <b><i>Salmonella</i> strain <sup>a</sup></b> | <b>cell type <sup>b</sup></b> | <b>time-point (h) <sup>c</sup></b> | <b>total number of reads <sup>d</sup></b> | <b>% of mapped reads <sup>e</sup></b> |
|----------------------------------------------|-------------------------------|------------------------------------|-------------------------------------------|---------------------------------------|
| -                                            | RAW 264.7                     | 0                                  | 43958                                     | 76.725                                |
| WT                                           | RAW 264.7                     | 4                                  | 47015                                     | 76.744                                |
| $\Delta$ SPI1                                | RAW 264.7                     | 4                                  | 33712                                     | 75.917                                |
| $\Delta$ SPI2                                | RAW 264.7                     | 4                                  | 40090                                     | 69.104                                |
| $\Delta$ SPI1/2                              | RAW 264.7                     | 4                                  | 41276                                     | 79.763                                |
| WT                                           | RAW 264.7                     | 24                                 | 47932                                     | 72.766                                |
| $\Delta$ SPI1                                | RAW 264.7                     | 24                                 | 42484                                     | 81.261                                |
| $\Delta$ SPI2                                | RAW 264.7                     | 24                                 | 40434                                     | 79.032                                |
| $\Delta$ SPI1/2                              | RAW 264.7                     | 24                                 | 41084                                     | 82.640                                |
| -                                            | HeLa                          | 0                                  | 48691                                     | 76.004                                |
| WT                                           | HeLa                          | 4                                  | 49258                                     | 74.260                                |
| WT                                           | HeLa                          | 8                                  | 40293                                     | 66.857                                |
| WT                                           | HeLa                          | 24                                 | 60039                                     | 51.566                                |
| -                                            | HeLa                          | 24                                 | 48319                                     | 82.175                                |

<sup>a</sup> *Salmonella* strain used for infection

<sup>b</sup> infected host cell type

<sup>c</sup> time-point post infection at which samples for cDNA library preparation were taken

<sup>d</sup> obtained number of 454 reads per library

<sup>e</sup> percentage of reads in the library that could be mapped to Sanger miRBase sequences

**Table S2.** Abundance of significantly regulated miRNAs in RAW 264.7 cells

| time-point <sup>a</sup>     | 0    | 24           | 24          | 24          | 24          | 24   |
|-----------------------------|------|--------------|-------------|-------------|-------------|------|
| strain <sup>b</sup>         | -    | WT           | SPI1        | SPI2        | SPI1/2      | -    |
| % of all reads <sup>c</sup> |      |              |             |             |             |      |
| mmu-miR-155                 | 0.41 | <b>10.51</b> | <b>9.20</b> | <b>8.53</b> | <b>9.81</b> | 0.54 |
| mmu-miR-146a                | 0.12 | <b>0.49</b>  | <b>0.30</b> | <b>0.25</b> | <b>0.41</b> | 0.14 |
| mmu-miR-146b                | 0.11 | <b>0.42</b>  | <b>0.41</b> | <b>0.35</b> | <b>0.45</b> | 0.12 |
| mmu-miR-21                  | 0.76 | <b>2.59</b>  | <b>6.84</b> | <b>7.65</b> | <b>7.19</b> | 0.69 |
| mmu-let-7a                  | 1.33 | <b>0.51</b>  | <b>0.52</b> | <b>0.55</b> | <b>0.04</b> | 1.01 |
| mmu-let-7c                  | 0.90 | <b>0.38</b>  | <b>0.54</b> | <b>0.61</b> | <b>0.68</b> | 0.84 |
| mmu-let-7d                  | 0.64 | <b>0.30</b>  | <b>0.30</b> | <b>0.35</b> | <b>0.24</b> | 0.66 |
| mmu-let-7f                  | 2.27 | <b>1.06</b>  | <b>1.63</b> | <b>1.80</b> | <b>1.31</b> | 2.21 |
| mmu-let-7g                  | 1.20 | <b>0.60</b>  | <b>0.82</b> | <b>0.82</b> | <b>0.70</b> | 1.27 |
| mmu-let-7i                  | 0.36 | <b>0.14</b>  | <b>0.44</b> | <b>0.42</b> | <b>0.50</b> | 0.35 |
| mmu-miR-98                  | 0.14 | <b>0.06</b>  | <b>0.07</b> | <b>0.06</b> | <b>0.05</b> | 0.15 |
| mmu-miR-27b                 | 5.59 | <b>6.25</b>  | <b>3.89</b> | <b>3.60</b> | <b>4.35</b> | 7.61 |
| mmu-miR-27a                 | 3.75 | <b>1.32</b>  | <b>4.39</b> | <b>4.17</b> | <b>4.21</b> | 5.14 |
| mmu-miR-222                 | 0.53 | <b>0.91</b>  | <b>0.61</b> | <b>0.59</b> | <b>0.70</b> | 0.35 |
| mmu-miR-1928                | 0.15 | <b>0.27</b>  | <b>0.13</b> | <b>0.17</b> | <b>0.18</b> | 0.14 |
| mmu-miR-30a                 | 0.06 | <b>0.04</b>  | <b>0.12</b> | <b>0.15</b> | <b>0.11</b> | 0.05 |
| mmu-miR-101a                | 0.04 | <b>0.06</b>  | <b>0.16</b> | <b>0.16</b> | <b>0.19</b> | 0.07 |
| mmu-miR-151-3p              | 0.05 | <b>0.02</b>  | <b>0.10</b> | <b>0.08</b> | <b>0.05</b> | 0.03 |
| mmu-miR-142-5p              | 0.30 | <b>0.43</b>  | <b>0.60</b> | <b>0.60</b> | <b>0.71</b> | 0.35 |
| mmu-miR-182                 | 0.25 | <b>0.32</b>  | <b>0.44</b> | <b>0.51</b> | <b>0.42</b> | 0.23 |
| mmu-miR-185                 | 0.25 | <b>0.15</b>  | <b>0.13</b> | <b>0.09</b> | <b>0.08</b> | 0.28 |
| mmu-miR-190                 | 0.01 | <b>0.00</b>  | <b>0.00</b> | <b>0.00</b> | <b>0.00</b> | 0.01 |
| mmu-miR-191                 | 1.37 | <b>1.37</b>  | <b>2.02</b> | <b>1.81</b> | <b>1.65</b> | 0.92 |
| mmu-miR-30e                 | 0.11 | <b>0.09</b>  | <b>0.27</b> | <b>0.31</b> | <b>0.33</b> | 0.10 |
| mmu-miR-19b                 | 0.23 | <b>0.16</b>  | <b>0.53</b> | <b>0.53</b> | <b>0.55</b> | 0.24 |
| mmu-miR-22                  | 0.16 | <b>0.35</b>  | <b>1.04</b> | <b>1.10</b> | <b>1.05</b> | 0.25 |
| mmu-miR-26b                 | 1.37 | <b>0.68</b>  | <b>0.55</b> | <b>0.48</b> | <b>0.67</b> | 1.05 |
| mmu-miR-92a                 | 1.98 | <b>0.83</b>  | <b>0.72</b> | <b>0.66</b> | <b>0.50</b> | 1.13 |
| mmu-miR-96                  | 0.03 | <b>0.02</b>  | <b>0.13</b> | <b>0.12</b> | <b>0.13</b> | 0.05 |
| mmu-miR-340-5p              | 0.06 | <b>0.08</b>  | <b>0.11</b> | <b>0.07</b> | <b>0.09</b> | 0.05 |
| mmu-miR-320                 | 0.30 | <b>0.18</b>  | <b>0.10</b> | <b>0.10</b> | <b>0.09</b> | 0.20 |
| mmu-miR-103                 | 1.33 | <b>1.08</b>  | <b>0.92</b> | <b>0.80</b> | <b>1.08</b> | 1.57 |
| mmu-miR-107                 | 0.61 | <b>0.43</b>  | <b>0.38</b> | <b>0.34</b> | <b>0.39</b> | 0.70 |
| mmu-miR-222                 | 0.53 | <b>0.91</b>  | <b>0.61</b> | <b>0.59</b> | <b>0.70</b> | 0.35 |
| mmu-miR-7a                  | 0.10 | <b>0.22</b>  | <b>0.37</b> | <b>0.32</b> | <b>0.41</b> | 0.12 |
| mmu-miR-362-3p              | 0.10 | <b>0.11</b>  | <b>0.05</b> | <b>0.04</b> | <b>0.07</b> | 0.13 |
| mmu-miR-378                 | 0.51 | <b>0.25</b>  | <b>0.24</b> | <b>0.22</b> | <b>0.17</b> | 0.45 |
| mmu-miR-425                 | 0.08 | <b>0.11</b>  | <b>0.31</b> | <b>0.29</b> | <b>0.29</b> | 0.10 |
| mmu-miR-1939                | 0.85 | <b>1.54</b>  | <b>0.95</b> | <b>1.21</b> | <b>0.54</b> | 1.52 |
| mmu-miR-1961                | 0.17 | <b>0.09</b>  | <b>0.05</b> | <b>0.05</b> | <b>0.07</b> | 0.15 |
| mmu-miR-805                 | 0.21 | <b>0.01</b>  | <b>0.02</b> | <b>0.00</b> | <b>0.01</b> | 0.09 |

<sup>a</sup> time-point post infection at which samples for cDNA-library preparation were taken

<sup>b</sup> applied *Salmonella* strain

<sup>c</sup> percent of reads in the respective library that match to the miRNA indicated; values in the shadowed fields below denote regulations greater two-fold

**Table S3.** Abundance of significantly regulated miRNAs in HeLa cells

| time-point <sup>a</sup>     | 0     | 24          | 24   |
|-----------------------------|-------|-------------|------|
| strain <sup>b</sup>         | -     | WT          | -    |
| % of all reads <sup>c</sup> |       |             |      |
| hsa-miR-1308                | 0.075 | <b>0.29</b> | 0.10 |
| hsa-let-7a                  | 1.08  | <b>0.59</b> | 1.22 |
| hsa-let-7b                  | 0.43  | <b>0.21</b> | 0.50 |
| hsa-let-7d                  | 0.18  | <b>0.08</b> | 0.18 |
| hsa-let-7f                  | 0.92  | <b>0.62</b> | 0.96 |
| hsa-let-7i                  | 0.36  | <b>0.18</b> | 0.42 |
| hsa-miR-16                  | 8.43  | <b>4.27</b> | 9.10 |
| hsa-miR-17                  | 7.16  | <b>3.09</b> | 6.88 |
| hsa-miR-20a                 | 4.70  | <b>3.41</b> | 6.82 |
| hsa-miR-93                  | 0.81  | <b>0.59</b> | 1.18 |
| hsa-miR-106a                | 0.09  | <b>0.04</b> | 0.10 |
| hsa-miR-196a                | 0.52  | <b>0.31</b> | 0.65 |
| hsa-miR-224                 | 0.29  | <b>0.26</b> | 0.63 |
| hsa-miR-151-5p              | 0.74  | <b>0.39</b> | 0.84 |
| hsa-miR-886-5p              | 0.13  | <b>0.02</b> | 0.06 |
| hsa-miR-1297                | 0.27  | <b>0.16</b> | 0.32 |

<sup>a</sup> time-point post infection at which samples for cDNA-library preparation were taken

<sup>b</sup> applied *Salmonella* strain

<sup>c</sup> percent of reads in the respective library that match to the miRNA indicated

**Figure S1**

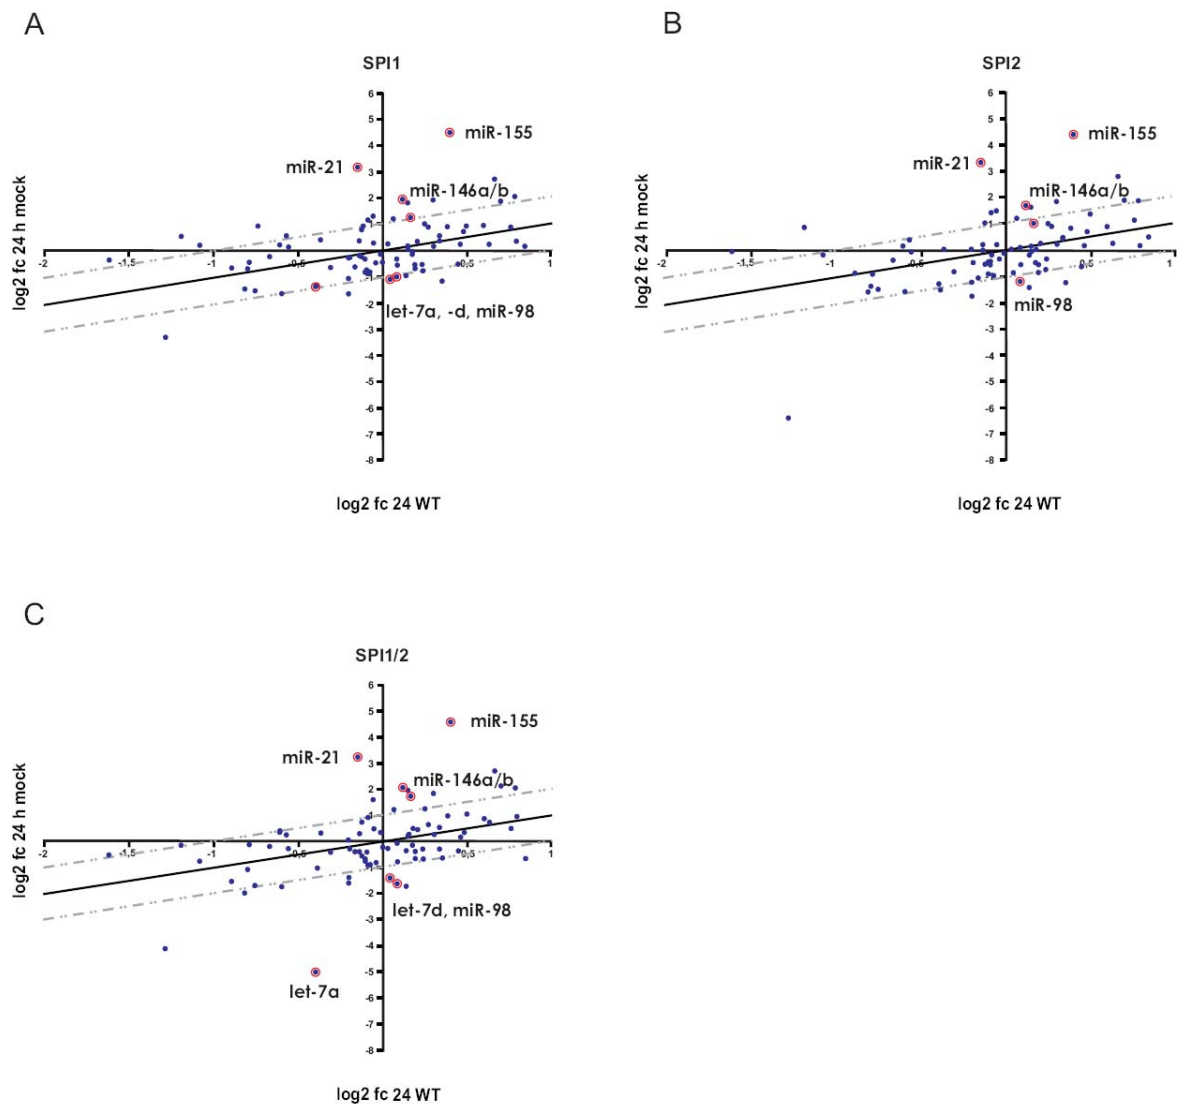

**Infection of RAW 264.7 cells with attenuated *Salmonella* mutants induces a similar miRNA expression pattern as wild-type infection (see Fig 1).** Infections were carried out using strains (A)  $\Delta$ SPI1, (B)  $\Delta$ SPI2, and (C)  $\Delta$ SPI1/2. Small RNA libraries of uninfected cells at 0 h, cells infected with wild-type *Salmonella* at 24 h pi and mock treated cells at 24 hours p.i., were analyzed by 454 sequencing, and microRNA expression changes were calculated by comparison of cDNA hits in the libraries (24 h infection vs 0 h, 24 h mock vs 0 h). The graphs show log<sub>2</sub> fold changes in infected cells (y-axis) versus log<sub>2</sub> fold changes in mock-treated cells (x-axis).

**Figure S2**

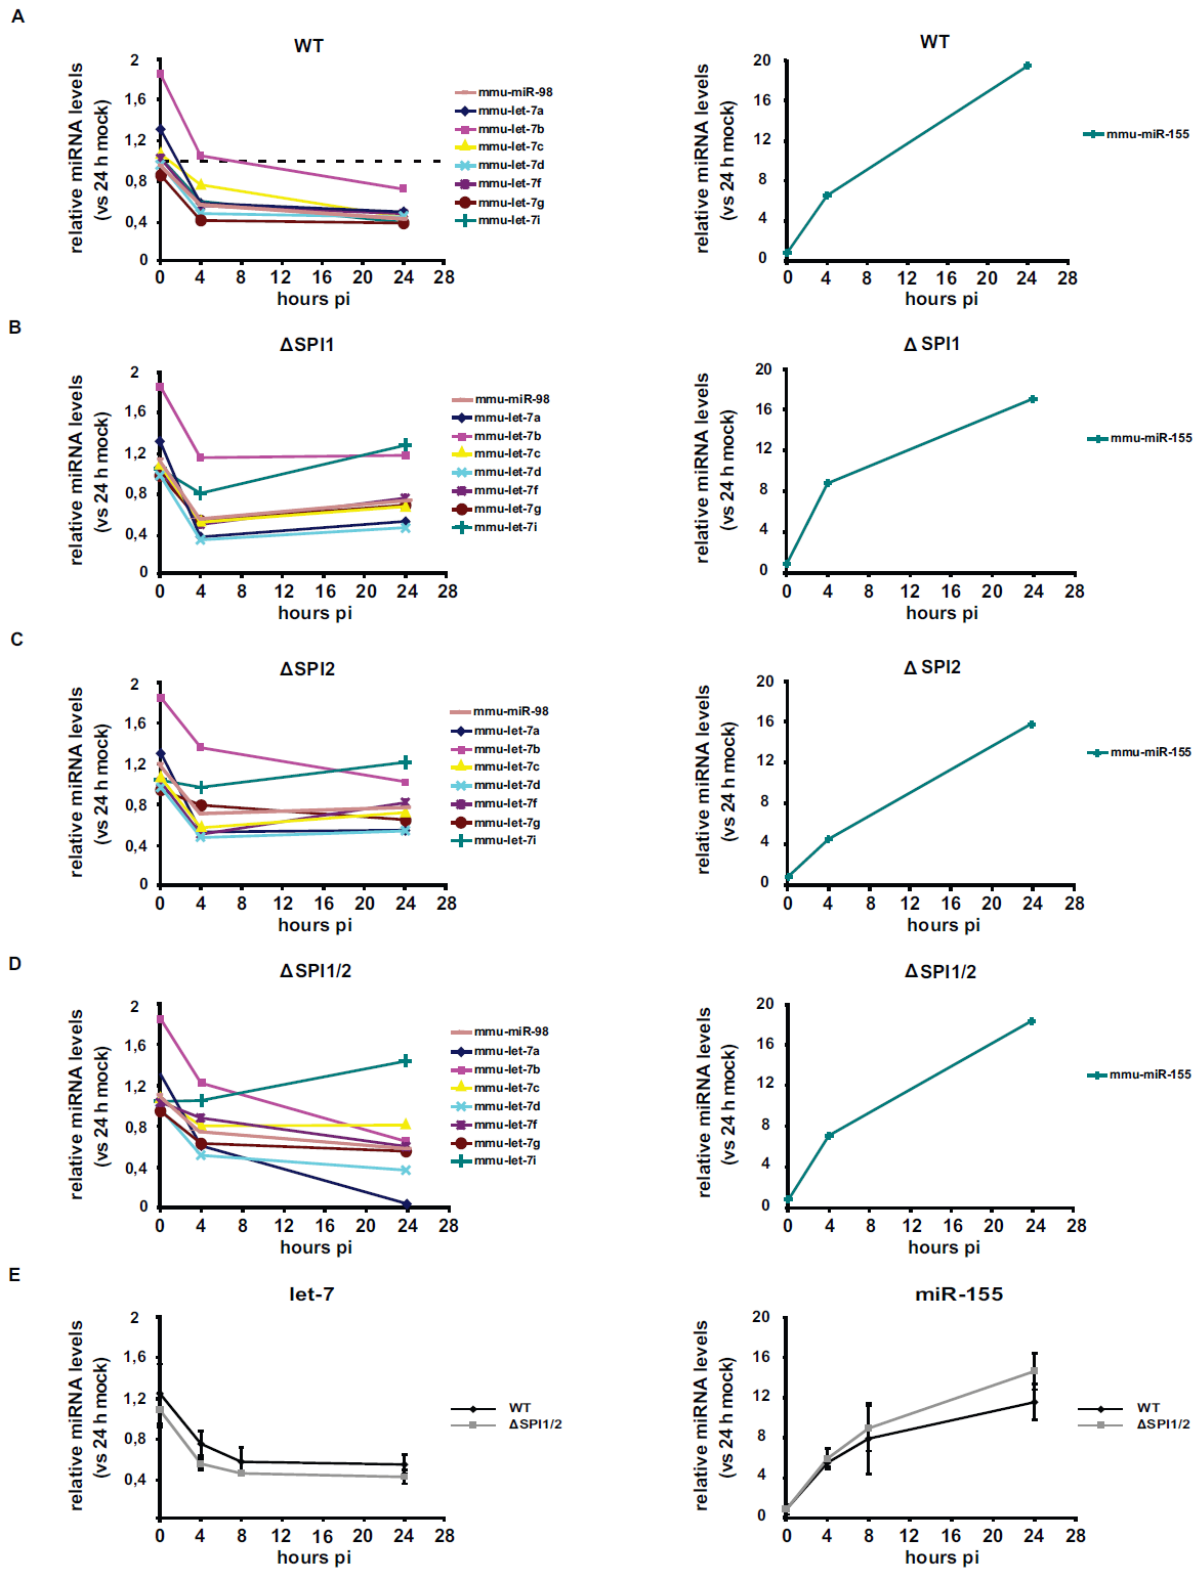

F

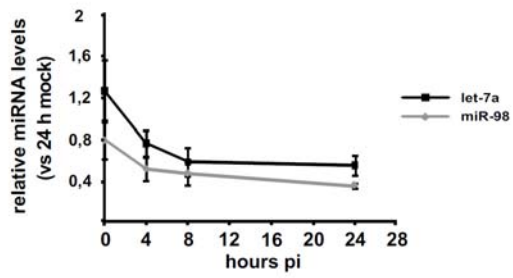

**Time-course analysis of *let-7* and miR-155 expression in RAW 264.7 cells.**

Comparative 454 sequencing (A-D) and qRT-PCR analysis (E) of miR-155 and *let-7a* at 4, 8 and 24 hours p.i. in RAW 264.7 cells. (F) Comparative qRT-PCR-analysis of *let-7a* and miR-98 expression at 4, 8 and 24 hours p.i. in RAW 264.7 cells. qRT-PCR results are shown as mean-values and standard deviations derived from three independent experiments. All fold-changes refer to the 24 h mock control.

**Figure S3**

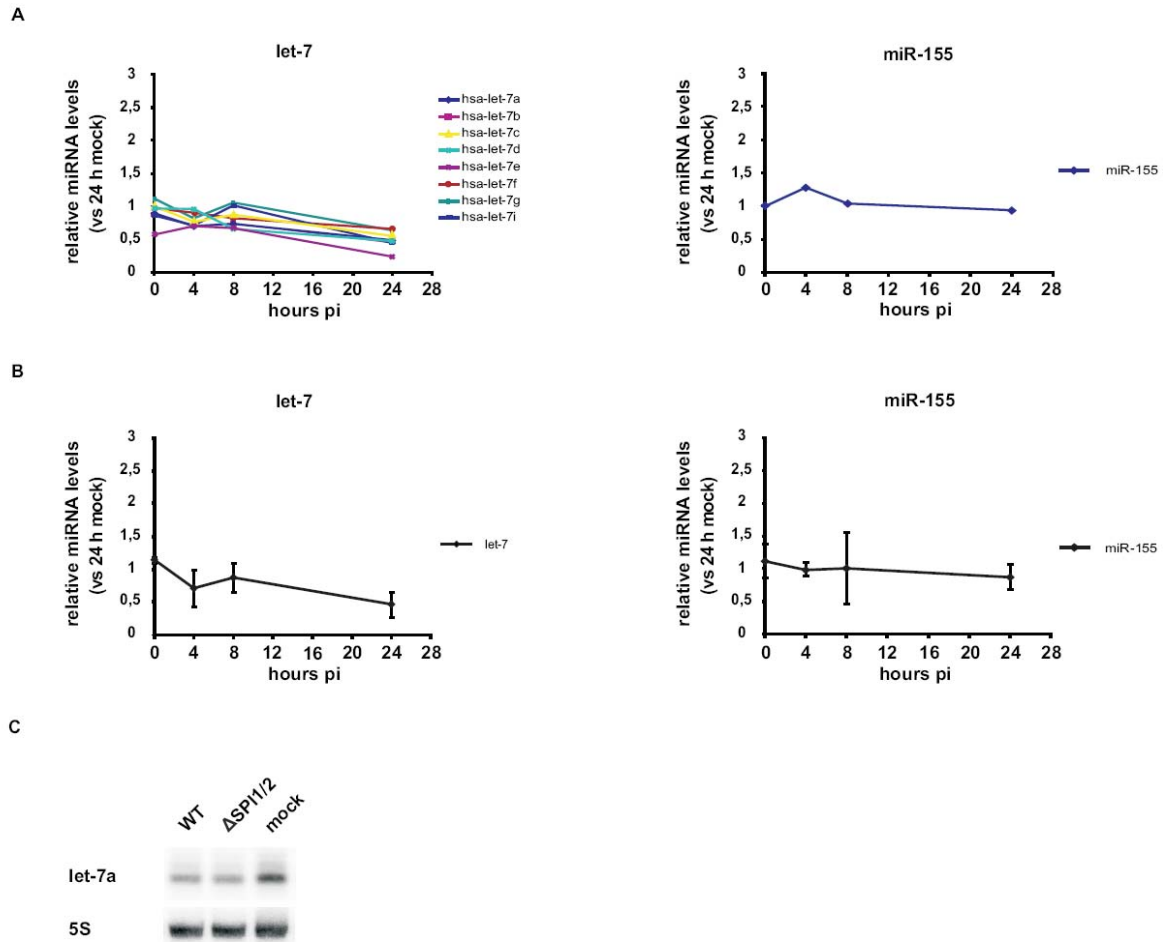

**Validation of let-7 regulation in HeLa cells.** Comparative 454 sequencing (A) and qRT-PCR (B) analysis of miR-155 and *let-7* family at 4, 8 and 24 hours pi in HeLa cells. (C) Northern-blot validation of let-7 regulation upon infection of HeLa cells with wild-type or  $\Delta$ SPI1/2 *Salmonella* for 24 h (compared to 24 h mock-treatment). All fold-changes refer to the 24 h mock control.



**Figure S4**

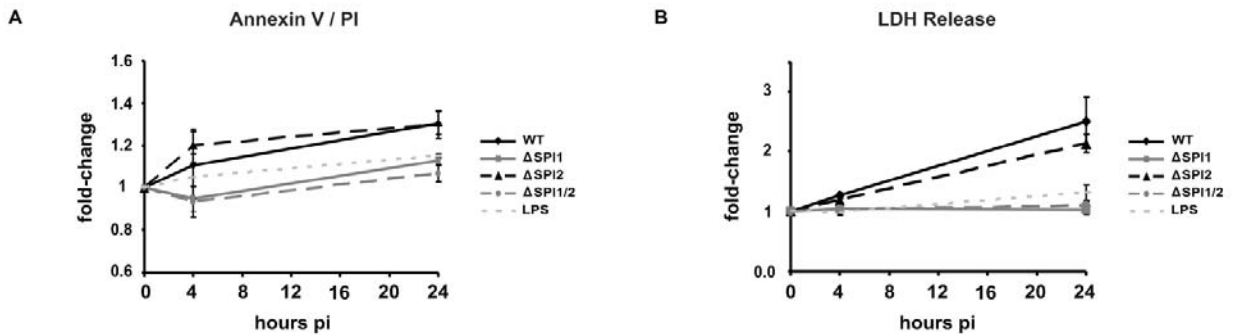

**Effect of *Salmonella* TTSS mutants and miRNA-mimics on apoptosis and necrosis.**

Induction of apoptosis (A) and cytotoxicity (B) in RAW 264.7 cells infected with the indicated *Salmonella* strains or stimulated with LPS. Fold-changes refer to the 0 h control.

Apoptosis induction was assessed by FACS-quantification of Annexin V-positive / PI-negative cells. Cytotoxicity was determined indirectly by photometric quantification of LDH-activity in cell-culture supernatants. Mean values and standard deviations derived from three independent experiments are shown. Significant induction of apoptosis and cytotoxicity (compared to mock-treatment) was observed for *Salmonella* wild-type and SPI2-mutant infection as well as for LPS-treatment ( $P$ -value < 0.05), however not for SPI1- and SPI1/2-mutant infection ( $P$ -value > 0.05).

**Figure S5**

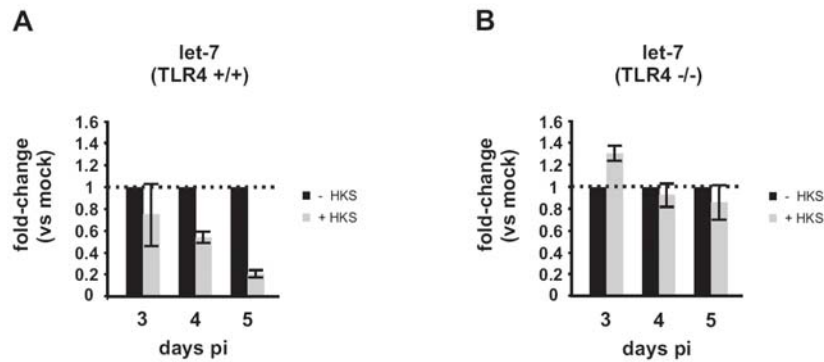

**Expression of let-7 in *Salmonella*-exposed primary macrophages.**

Expression of let-7 in bone-marrow derived primary macrophages obtained from wild-type (A) or TLR4<sup>-/-</sup> (B) animals as determined by qRT-PCR. Cells were differentiated with murine colony-stimulating factor (MCSF) alone (-HKS) or with MCSF + heat killed *Salmonella* (+HKS). Average fold-regulation of let-7 upon HKS-treatment and standard deviations derived from three independent experiments are shown. Let-7 regulation upon HKS-challenge of TLR4<sup>+/+</sup> cells was significantly different compared to the respective regulation observed in TLR4<sup>-/-</sup> cells ( $P$ -values < 0.05).

Figure S6

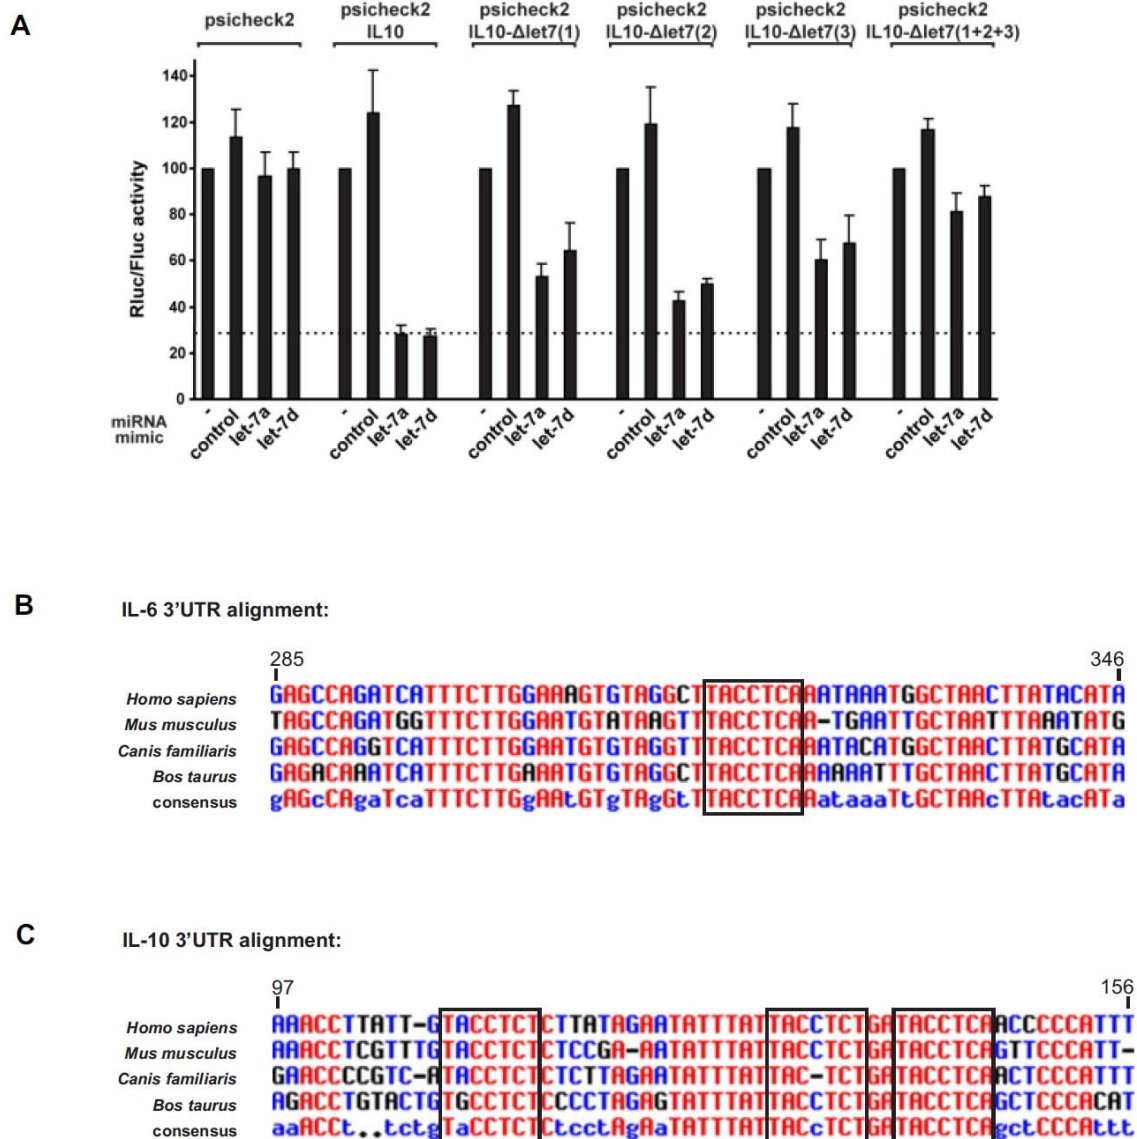

**IL-6 and IL-10 3'UTRs contain binding sites for *let-7*.**

MEF cells were transfected with a mixture containing the psicheck2 (control) plasmid or the *Renilla* luciferase reporter plasmids carrying the 3' UTR of IL-10, or mutants thereof, in combination with microRNA mimics (A). Let-7 binding sites within the IL-6 (B) and IL-10 (C) 3' UTRs are conserved among mammalian genomes. Numbers above the *Homo sapiens* sequence in both alignments refer to the nucleotide position within the human 3' UTR. Sequence alignment was performed using the Multalin web-interface (<http://multalin.toulouse.inra.fr/multalin/>; Corpet F. 1988 Multiple sequence alignment with hierarchical clustering. *Nucleic Acids Research* 16 (22): 10881-10890).

**Figure S7**

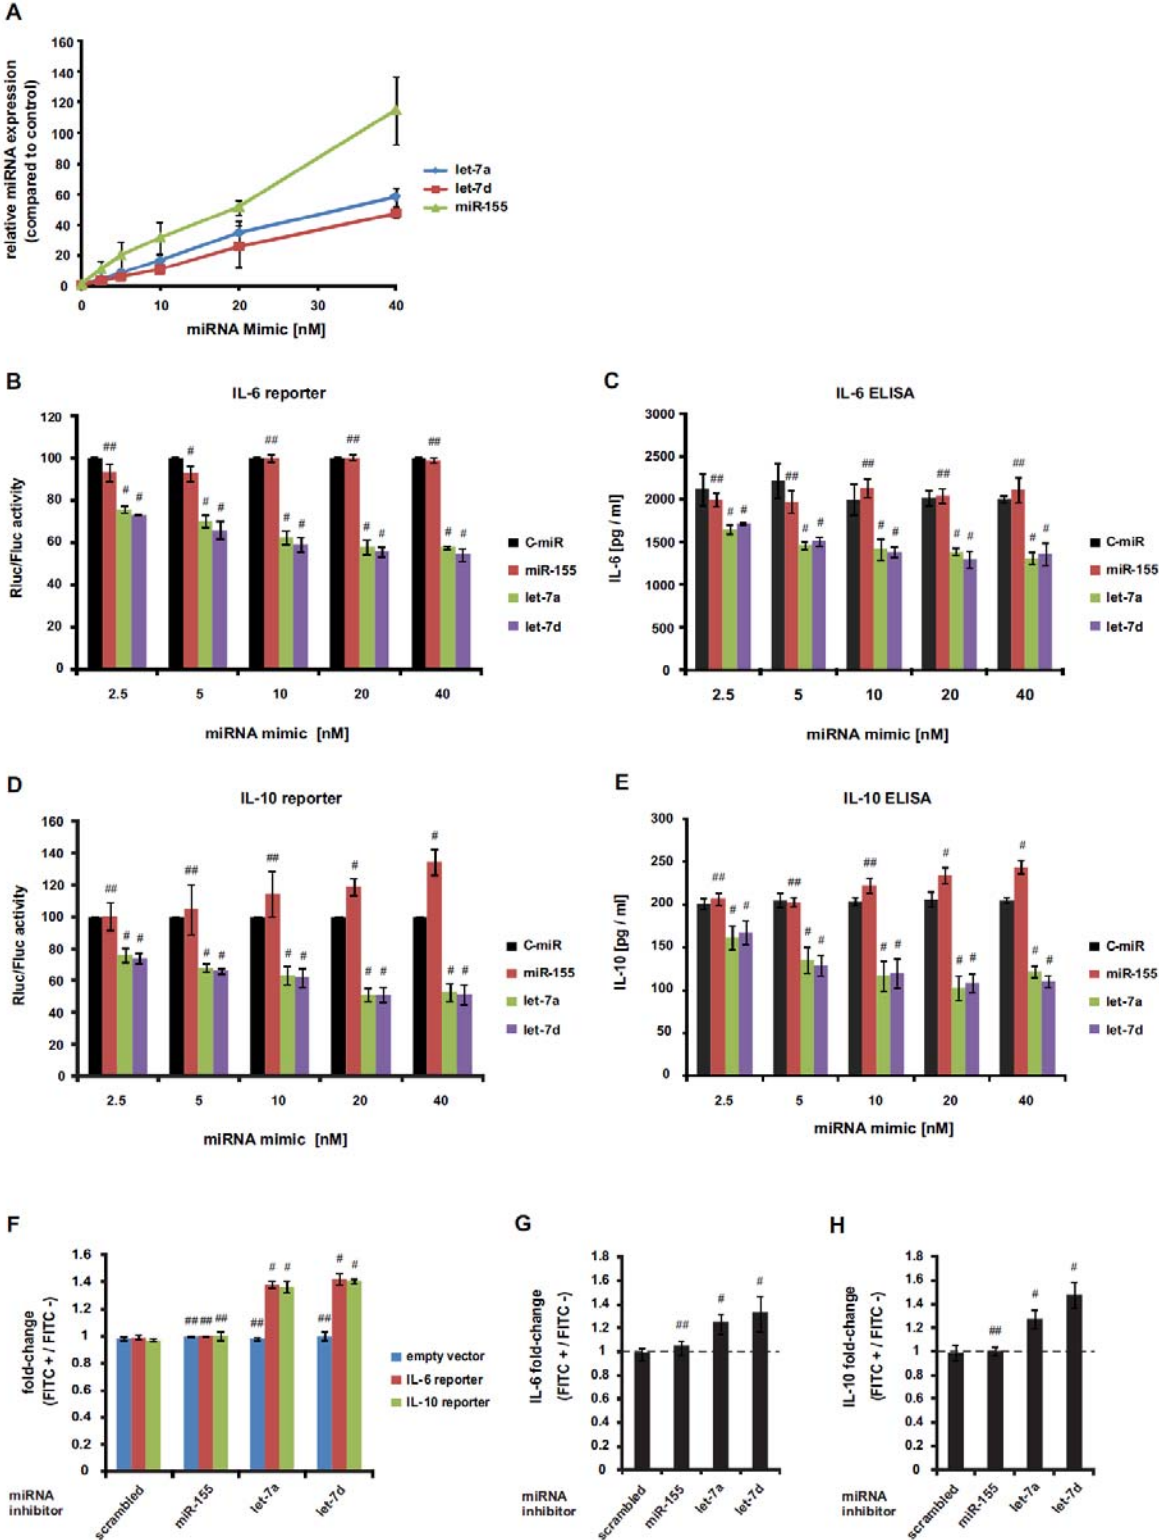

**Analysis of IL-6 and IL-10 reporter regulation and cytokine secretion upon artificial modulation of let-7 and miR-155 levels in *Salmonella* infected RAW 264.7 cells.** Overexpression of let-7a, let-7d and miR-155 using pre-miR precursor molecules was verified by

TaqMan qRT-PCR, compared to a lipofected control (A). let-7 over-expression caused repression of IL-6 and IL-10 reporters (B, D) and decrease of IL-6 and IL-10 abundance in cell-culture supernatants (C, E). # Significant difference compared to C-miR treatment. ## No significant difference compared to C-miR treatment.

Inhibition of miRNAs was carried out using fluorescein (FITC) labelled LNAs. Following separation of the FITC-positive and -negative fractions by cell-sorting, IL-6 and IL-10 reporter activity (F) and cytokine secretion (G, H) in the FITC-positive fraction (FITC+) was compared to the negative fraction (FITC-). # Significant difference compared to scrambled LNA treatment. ## No significant difference compared to scrambled LNA treatment.

**Figure S8**

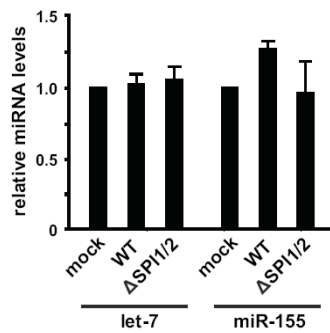

**Validation of let-7 and miR-155 expression in MEF cells.** Expression of let-7a and miR-155 in MEF cells upon infection as detected 24 h post infection with wild-type or  $\Delta$ SPI1/2 *Salmonella* by qRT-PCR. Fold-changes refer to the 24 h mock control.
