# Supplementary material
Source: PubMed Central journal article supplement (PMC3098495)
Supplement: emboj201194s2.pdf [file emboj201194s2.pdf]

Manuscript EMBO-2010-76212

**Analysis of the host microRNA response to Salmonella uncovers the control of major cytokines by the *let-7* family**

Leon N. Schulte, Ana Eulalio, Hans-Joachim Mollenkopf, Richard Reinhardt and Jörg Vogel

*Corresponding author: Jörg Vogel, University of Würzburg*

---

**Review timeline:**

Submission date:

09 July 2010

Accepted:

04 March 2011

---

There is no Peer Review Process File for this manuscript.
